# Supplementary material
Source: PubMed Central journal article supplement (PMC3578116)
Supplement: NIHMS439672-supplement-1_si_001.pdf [file NIHMS439672-supplement-1_si_001.pdf]

```

ALPHA      -MATITCTRFTEEYQLFEELGKGAFSVVRRVCVKVLAGQEYAAKIINTKKLSARDHQKLER 59
BETA      MATTVTCTRFTEDEYQLYEDIGKGAFSVVRRVCVKLCTGHEYAAKIINTKKLSARDHQKLER 60
GAMMA     MATTATCTRFTEDDYQLFEELGKGAFSVVRRVCVKKTSTQEYAAKIINTKKLSARDHQKLER 60
DELTA     MASTTTCTRFTEDEYQLFEELGKGAFSVVRRCMKIPTGQEYAAKIINTKKLSARDHQKLER 60
          : * * * * * : * * * * * : * * * * * : * * * * * : * * * * * : * * * * *

ALPHA      EARICRLLKHPNIVRLHDSISEEGHHYLI FDLVTGGELFEDIVAREYYSEADASHCIQQI 119
BETA      EARICRLLKHSNIVRLHDSISEEGFHYLVFDLVTGGELFEDIVAREYYSEADASHCIQQI 120
GAMMA     EARICRLLKHPNIVRLHDSISEEGFHYLVFDLVTGGELFEDIVAREYYSEADASHCIHQI 120
DELTA     EARICRLLKHPNIVRLHDSISEEGFHYLVFDLVTGGELFEDIVAREYYSEADASHCIQQI 120
          * * * * * : * * * * * : * * * * * : * * * * * : * * * * * : * * * * *

ALPHA      LEAVLHCHQMVGVVHRDLKPENLLLASKLGAAVKLADFLAIEVEGEQQAWFGFAGTPGY 179
BETA      LEAVLHCHQMVGVVHRDLKPENLLLASKCKGAAVKLADFLAIEVQGDQQAWFGFAGTPGY 180
GAMMA     LESVNHQHDIIVHRDLKPENLLLASKCKGAAVKLADFLAIEVQGEQQAWFGFAGTPGY 180
DELTA     LESVNHCHLNGIIVHRDLKPENLLLASKSKGAAVKLADFLAIEVQGDQQAWFGFAGTPGY 180
          * * * * * : * * * * * : * * * * * : * * * * * : * * * * * : * * * * *

ALPHA      LSPEVLRKDPYKGPVDLWACGVILYILLVGYPPFWEDEDQHRLYQQIKAGAYDFPSPPEWDT 239
BETA      LSPEVLRKEAYGKPVDIWACGVILYILLVGYPPFWEDEDQHKLYQQIKAGAYDFPSPPEWDT 240
GAMMA     LSPEVLRKDPYKGPVDIWACGVILYILLVGYPPFWEDEDQHKLYQQIKAGAYDFPSPPEWDT 240
DELTA     LSPEVLRKDPYKGPVDMWACGVILYILLVGYPPFWEDEDQHRLYQQIKAGAYDFPSPPEWDT 240
          * * * * * : * * * * * : * * * * * : * * * * * : * * * * * : * * * * *

ALPHA      VTPEAKDLINKMLTINPAKRITAEALKHPWISHRSTVASCMHRQETVDCCLKFNARRKL 299
BETA      VTPEAKNLINQMLTINPAKRITAEALKHPWVCQRSTVASMMHRQETVECLKKFNARRKL 300
GAMMA     VTPEAKNLINQMLTINPAKRITADQALKHPWVCQRSTVASMMHRQETVECLRFNARRKL 300
DELTA     VTPEAKDLINKMLTINPAKRITASEALKHPWICQRSTVASMMHRQETVDCCLKFNARRKL 300
          * * * * * : * * * * * : * * * * * : * * * * * : * * * * * : * * * * *

ALPHA      KGAILTTMLATRNFSG-----I-----II-----IV-----324
BETA      KGAILTTMLATRNFSVGRQTTAPATMSTAASGTTMGLVECAKSLLNKKADG-VKPPQTNST 359
GAMMA     KGAILTTMLVSRNFSF-----AKSLLNKKS DGGVKPQSN-N 335
DELTA     KGAILTTMLATRNFSF-----AKSL--KPDGVIINNK-- 332
          * * * * * : * * * * * : * * * * * : * * * * * : * * * * * : * * * * *

ALPHA      -----ESSESTNTTIEDETKVRKQEI IKVTE 355
BETA      KNSAITS PKGSLPPAALEPQTTVIHNPVDGIKESSDSTNTTIEDEDAKARKQEI IKTE 419
GAMMA     KNSLVSPAQEPAPLQTAMEPQTTVVHNATDGIKSGSTESCNTTIEDEDLKVRKQEI IKITE 395
DELTA     ANVVT--SPKENIPTPALEPQTTVIH-NPDGNKESSTESCNTTIEDEDKARKQEI IKVTE 389
          * * * * * : * * * * * : * * * * * : * * * * * : * * * * * : * * * * *

ALPHA      OLIEAISNGDFESYTKMCDPGMTAFEPEALGNLVEGLDFHFRFYFENLWSRNSKPVHTTIL 415
BETA      OLIEAVNNGDFEAYAKICDPGLTSFEPEALGNLVEGMDFHRFYFENLLAKNSKPIHTTIL 479
GAMMA     OLIEAINNGDFEAYTKICDPGLTSFEPEALGNLVEGMDFHFKFYFENLLSKNSKPIHTTIL 455
DELTA     OLIEAINNGDFEAYTKICDPGLTAFEPEALGNLVEGMDFHRFYFENALPKINKPIHTIIL 449
          * * * * * : * * * * * : * * * * * : * * * * * : * * * * * : * * * * *

ALPHA      NPHIHLMGDESACIAYIRITQYLDAGGIPRTAQSEETRVWHRRDGKWQIVHFRSGAPSV 475
BETA      NPHVHVIGEDAACIAYIRLTQYIDGQGRPRTSQSEETRVWHRPDGKWQNVHFCSGAPVA 539
GAMMA     NPHVHVIGEDAACIAYIRLTQYIDGQGRPRTSQSEETRVWHRRDGKWLVNHVYHCSGAPAA 515
DELTA     NPHVHLVGDDAACIAYIRLTQYMDGNGMPKTMQSEETRVWHRRDGKWQNIHFRSGSPTV 509
          * * * * * : * * * * * : * * * * * : * * * * * : * * * * * : * * * * *

ALPHA      LPH----- 478
BETA      PLQ----- 542
GAMMA     PLQ----- 518
DELTA     PIKPPCIPNGKENFSGGSLWQNI- 533
          :

```

165x224mm (300 x 300 DPI)
